1           **Cross-platform proteomics to advance genetic prioritisation strategies**

2

3   Maik Pietzner<sup>1,2</sup>, Eleanor Wheeler<sup>1</sup>, Julia Carrasco-Zanini<sup>1</sup>, Nicola D. Kerrison<sup>1</sup>, Erin Oerton<sup>1</sup>, Mine  
4   Koprulu<sup>1</sup>, Jian'an Luan<sup>1</sup>, Aroon D. Hingorani<sup>3,4,5</sup>, Steve A. Williams<sup>6</sup>, Nicholas J. Wareham<sup>1,5</sup>, Claudia  
5   Langenberg<sup>1,2,5\*</sup>

6

7   **Affiliations**

8   <sup>1</sup>MRC Epidemiology Unit, University of Cambridge, Cambridge, UK

9   <sup>2</sup>Computational Medicine, Berlin Institute of Health (BIH) at Charité – Universitätsmedizin Berlin,  
10   Germany

11   <sup>3</sup>Institute of Cardiovascular Science, Faculty of Population Health, University College London, London  
12   WC1E 6BT, UK

13   <sup>4</sup>UCL BHF Research Accelerator centre

14   <sup>5</sup>Health Data Research UK

15   <sup>6</sup>SomaLogic, Inc., Boulder, CO, USA

16

17   \*Correspondence to Dr Claudia Langenberg ([claudia.langenberg@mrc-epid.cam.ac.uk](mailto:claudia.langenberg@mrc-epid.cam.ac.uk))

18

19

20 **ABSTRACT**

21 Discovery of protein quantitative trait loci (pQTLs) has been enabled by affinity-based proteomic  
22 techniques and is increasingly used to guide genetically informed drug target evaluation. Large-scale  
23 proteomic data are now being created, but systematic, bidirectional assessment of platform  
24 differences is lacking, restricting clinical translation. We compared genetic, technical, and phenotypic  
25 determinants of 871 protein targets measured using both aptamer- (SomaScan® Platform v4) and  
26 antibody-based (Olink) assays in up to 10,708 individuals. Correlations coefficients for overlapping  
27 protein targets varied widely (median 0.38, IQR: 0.08-0.64). We found that 64% of pQTLs were  
28 shared across both platforms among all identified 608 *cis*- and 1,315 *trans*-pQTLs with sufficient  
29 power for replication, but with correlations of effect estimates being lower than previously reported  
30 (*cis*: 0.41, *trans*: 0.34). We identified technical, protein, and variant characteristics that contributed  
31 significantly to platform differences and found contradicting phenotypic associations attributable to  
32 those. We demonstrate how integrating phenomic and gene expression data improves genetic  
33 prioritisation strategies, including platform-specific pQTLs.

34

## 35 INTRODUCTION

36 Proteins are the essential functional units of human metabolism that translate genomic information  
37 and enable growth, development, and homeostasis. Naturally occurring sequence variation in the  
38 human genome, either in close physical proximity to the protein-encoding gene (*cis*) or anywhere  
39 else in the genome (*trans*), has wide-ranging effects on proteins, including, but not limited to,  
40 expression, structure, or function, with possible major health consequences<sup>1,2</sup>. Early studies have  
41 started to describe the genetic architecture of protein targets measured in plasma but have been  
42 small scale or restricted to one platform<sup>3-8</sup>.

43 Modulating protein abundances or function represents the most common mode of action of drugs<sup>9</sup>  
44 and major pharmaceutical companies now integrate protein quantitative trait loci (pQTLs) into their  
45 strategies to identify new drug targets or repurpose existing drugs<sup>10-12</sup>. This has only been possible  
46 through the commercial development and application of scalable affinity-based proteomic  
47 techniques that can measure thousands of protein targets simultaneously. Projects are now  
48 underway to apply these techniques to large-scale studies, such as the UK Biobank<sup>13,14</sup>, which will  
49 provide major scientific opportunities. However, information about the consistency of protein  
50 measures and pQTLs across platforms is needed to inform the generalisability of genetic findings and  
51 strategies for future data integration and meta-analytical approaches.

52 The deep coverage of the plasma proteome, including thousands of proteins, is possible using large-  
53 scale libraries of affinity reagents, with the SomaScan<sup>®</sup> assay (aptamer-based) and the Olink  
54 proximity extension assay (PEA, antibody-based) providing the broadest coverage. Briefly, the  
55 SomaScan assay utilizes short single-stranded oligonucleotides, which are chemically modified to  
56 increase affinity to specific protein targets and DNA microarray technology is used to quantify the  
57 number of aptamers bound to protein targets<sup>15</sup>. Olink relies on monoclonal or polyclonal antibodies  
58 labelled with single oligonucleotides that create pairs of antibodies binding to different epitopes of  
59 the protein target. The oligonucleotides hybridise only if a matched pair of antibodies bind, and the  
60 resulting short DNA fragment is measured using qPCR or next generation sequencing<sup>16</sup>. Despite  
61 measurement units, i.e., relative intensities, not being directly comparable between platforms,  
62 analysis of correlations and rank based variation between platform is scale-free and, further,  
63 orthogonal evidence from genetic variation at protein-encoding genes (*cis*-pQTLs) can be used to  
64 compare platforms.

65 Both techniques rely on conserved binding regions of the protein target, epitopes, to provide  
66 reliable estimates of protein concentrations and protein altering variants mapping to epitopes haven

67 been widely recognized to possibly introduce binding artefacts<sup>1,17,18</sup>. While we and others<sup>3,5,18,19</sup> have  
68 recently demonstrated that pQTLs can successfully be replicated across platforms for a selected set  
69 of overlapping proteins, this has not been systematically evaluated across hundreds of protein  
70 targets than can now be mapped across the latest versions of these platforms.

71 Here we assess 871 proteins targeted by both the Somalogic and Olink platforms and measured in  
72 up to 10,708 individuals, including overlapping measurements by both technologies in a subset of  
73 485 participants. We use a machine learning approach to identify technical parameters and protein  
74 characteristics that contribute to variation between platforms. We identify hundreds of pQTLs and  
75 systematically assess their consistency in a reciprocal design, that is, by taking each pQTL forward for  
76 assessment irrespective of the discovery platform, generating a unique benchmark for future  
77 studies.

## 78 **RESULTS**

79 We used the SomaScan v4 platform (SomaLogic Inc., Boulder, Colorado, US) to measure protein  
80 abundances of 4,775 unique human protein targets (covered by 4,979 unique aptamers) from frozen  
81 EDTA-plasma samples in 12,345 participants in the Fenland study. We assessed 1,069 protein targets  
82 based on 1,104 measures across 12 Olink® Target 96-plex panels, based on the proximity extension  
83 assay (PEA) technology using the same EDTA-plasma samples from 485 Fenland study participants.  
84 Measurements were performed by the manufacturers and methods have previously been described  
85 in detail<sup>19,20</sup> and are provided in the Methods section.

86 We identified overlapping protein targets between both techniques using either UniProt identifiers  
87 ([www.uniprot.org](http://www.uniprot.org)) or based on the same encoding gene as provided by the manufacturers. Where  
88 multiple measurements were available for a protein assayed on multiple Olink panels, we selected  
89 one of the protein measures from one of the panels at random for two reasons. Firstly, Olink uses  
90 the same type of antibodies irrespective of the panel and secondly, the average correlation was 0.90  
91 (range 0.68-0.99) for the same protein target across different panels. We kept each SOMAmer  
92 reagent matching to one Olink reagent for downstream analysis, since they bind to distinct structural  
93 characteristics of the protein target<sup>15</sup>. This procedure yielded 937 unique SOMAmer – Olink  
94 measurement pairs, comprising 871 unique protein targets (**Fig. 1 and Supplementary Tab. S1**).

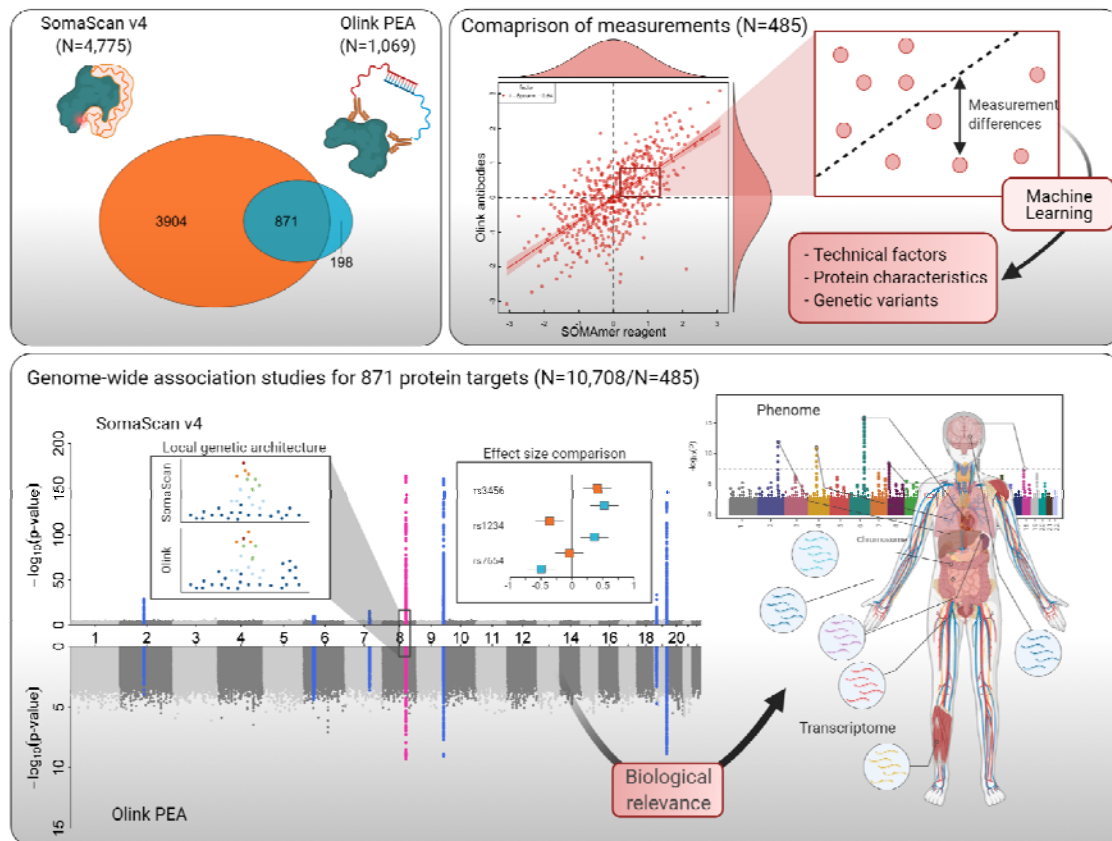

95

96 **Figure 1 Scheme of the study design.** The Venn diagram displays the overlap in protein targets  
 97 captured by the SomaScan assay and the Olink proximity extension assay (PEA). Modes of binding to  
 98 the protein target are depicted simplified next to each ellipse. Correlation coefficients were used to  
 99 compare both technologies and factors possibly accounting for measurement differences and low  
 100 correlation coefficients examined in a subset of 485 individuals with overlapping measurements. For  
 101 the set of 871 common protein targets genome-wide association analysis were performed in 10,708  
 102 (SomaScan assay) and 485 (Olink PEA) participants of the Fenland cohort. Correspondence of genetic  
 103 associations was analysed by examining local genetic architecture, comparison of effect estimates,  
 104 and evaluation of phenotypic consequences.

### 105 **Technical factors affecting correlations between protein targets**

106 The median Spearman correlation coefficient between overlapping protein targets was 0.38 (IQR:  
 107 0.08-0.64), with large variation (range: -0.61 to 0.96), including examples with high (Leptin,  $r=0.95$ ),  
 108 absent (Interleukin-12,  $r=0.02$ ), and inverse correlations (Heat shock protein beta-1,  $r=-0.48$ ) (**Fig. 2a**  
 109 **and Supplementary Tab. 1**). We tested for systematic variation among correlation coefficients due  
 110 to technical factors or protein characteristics using a random forest-based feature selection  
 111 algorithm (see **Methods**). We identified assay characteristics, including values below the detection  
 112 limit of the assay, the affinity of the SOMAmer reagent to its protein target ('apparent  $K_d$ '), or the  
 113 proportion of measurements far off from the median value ('%-outlier SomaScan/Olink' – median  
 114  $\pm 5 * MAD$ ), to be more relevant to explain varying correlation coefficients compared to any structural

115 properties of the assayed protein targets (Fig. 2). Proteins with a transmembrane domain showed on  
 116 average lower correlations compared to those without (Fig. 2). We suspect that SOMAmer reagents  
 117 or antibodies binding to the part of the plasma protein excluding the transmembrane domain may  
 118 measure both intact and post-translationally modified proteins, those that are generated after  
 119 proteolytic removal of the ectodomain<sup>21</sup>. Inflammatory mediators, such as tumour necrosis factor  
 120 alpha, are activated by proteolytic cleavage from the transmembrane domain and hence the ability  
 121 to specifically target and distinguish this active fraction of the protein target may be relevant to the  
 122 studying of its pathological relevance. Further, selection of affinity reagents against proteins with  
 123 transmembrane domains might be complicated by the incomplete *in vitro* folding of synthetic  
 124 peptides.

125 We did not find evidence for a systematic pathway bias for either of the two technologies in that  
 126 protein targets with lower correlations ( $r < 0.2$ ) were not enriched for any particular biological  
 127 pathway.

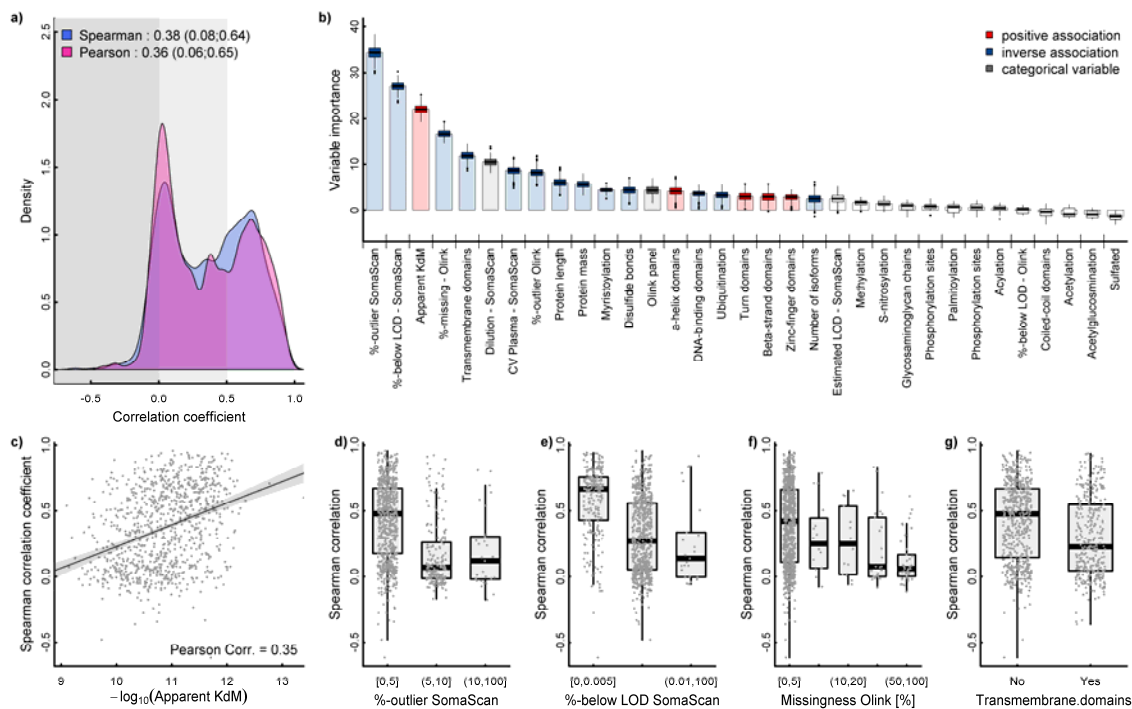

128

129 **Figure 2 Summary of correlations between measurements on both platforms.** a) Distribution of  
 130 correlation coefficients across 937 mapping aptamer – Olink measure pairs (n=871 unique protein  
 131 targets). b) Importance measures derived from a random forest-based variable selection procedure  
 132 to predict Spearman correlation coefficients including technical factors and protein characteristics.  
 133 Coloured box plots indicate variables for which the importance measure remained significant after  
 134 accounting for multiple testing. c-g) Individual-level plots of correlation coefficients for the most  
 135 important characteristics. %-below LOD = Fraction of measurement values below the detection limit  
 136 of the assay.

137

138

139 ***Variation of genetic effect estimates between platforms***

140 To systematically test for cross-platform consistency of protein-quantitative trait loci (pQTLs) we  
141 performed a reciprocal comparison of effect estimates of genome-wide association analysis of 871  
142 common protein targets using the SomaScan v4 assay (N=10,708,  $p < 1.004 \times 10^{-11}$ ) with 12 Olink  
143 panels (N=485,  $p < 4.5 \times 10^{-11}$ , **Fig. 3**) in the Fenland study. This analysis overcomes the biased  
144 assessment of previous one-way or within platform replication efforts<sup>4,5,18</sup>. To test the potential  
145 influence of sample size on this comparison, we additionally compared the SomaScan-derived pQTLs  
146 to published genetic effect estimates for 90 protein targets from the Olink CVD-I panel including up  
147 to 22,000 participants from the SCALLOP consortium<sup>8</sup>.

148 We identified a total of 1,923 SOMAmer - Olink - genetic variant triplets (N=608 in *cis*, N=1,315 in  
149 *trans*, **Supplementary Tab. 2**) with evidence from either platform, including 816 SOMAmer reagents,  
150 770 Olink measures, and 1,267 single nucleotide variants (SNVs), following pruning of variants in  
151 high linkage disequilibrium (LD,  $R^2 > 0.8$ ). The correlation of effect estimates was higher for *cis*-pQTLs  
152 ( $r = 0.41$ ) than *trans*-pQTLs ( $r = 0.34$ ) and was considerably lower than those reported in previous  
153 studies which did not perform bidirectional assessment or inflated correlation estimates by not  
154 aligning effect estimates to either the protein-increasing or -decreasing allele and thereby  
155 'artificially' increasing the scale of observed effect estimates<sup>5,19</sup> (**Fig. 3**). Correlations of genetic effect  
156 estimates differed according to observational correlations between targets, with high correlations  
157 (0.68 and 0.75 for *cis*- and *trans*-pQTLs, respectively) seen across the 351 protein targets with  
158 observational correlations  $r \geq 0.5$  (**Supplementary Fig. 1**), but no correlation ( $r = -0.07$  for *cis*-pQTLs  
159 and  $r = -0.10$  for *trans*-pQTLs) for those 265 with low observational correlations ( $r < 0.2$ ).

160 Results were consistent ( $r = 0.49$  for *cis*-pQTLs and  $r = 0.34$  for *trans*-pQTLs, **Fig. 3**) when using  
161 summary statistics from up to 22,000 participants for the subset of Olink CVD-I panel proteins  
162 (**Supplementary Tab. 3**) and comparing 496 SOMAmer - Olink - SNV triplets (N=95 in *cis*, N=401 in  
163 *trans*).

164

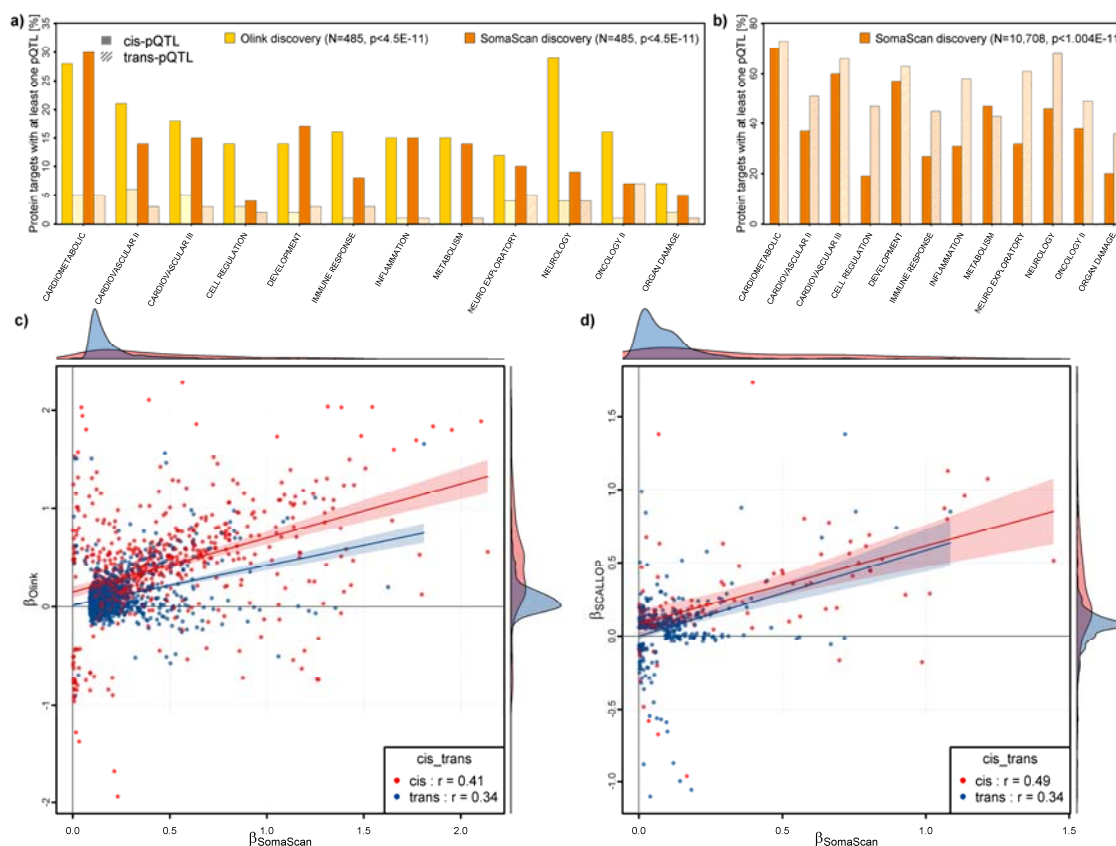

165

166 **Figure 3 Results from genome-wide association analysis and reciprocal look-up. a)** Fraction of  
 167 protein targets with at least one protein-quantitative trait loci (pQTL) in *cis* (opaque) or *trans*  
 168 (shaded) using either Olink (yellow) or the SomaScan assay (orange) in an overlapping set of 485  
 169 participants, grouped by Olink panel. Numbers refer to the set of 871 protein targets measured by  
 170 both techniques. **b)** The fraction of protein targets with pQTLs in the entire Fenland cohort  
 171 (N=10,708) based on the SomaScan assay. **c)** Comparison of beta estimates from linear regression  
 172 models across 816 corresponding SOMAmer - Olink pairs (n=770 unique protein targets) with at  
 173 least one genome-wide associated genetic variant for either of the two, including 1,267 distinct  
 174 genetic variants ( $R^2 < 0.8$ ). Colouring is based on the genomic location of genetic variants. Red  
 175 indicates variants close to the protein encoding gene (*cis*,  $\pm 500$ kb) and blue otherwise. **d)**  
 176 Comparison of beta estimates from linear regression models across 85 corresponding SOMAmer -  
 177 Olink pairs (n=77 unique protein targets) with at least one genome-wide associated genetic variant  
 178 for either of the two, including 428 distinct genetic variants ( $R^2 < 0.8$ ). Genetic variants for Olink  
 179 measures were derived from the most recent SCALLOP effort covering the CVD-I panel<sup>8</sup>.

180

### 181 **Cross-platform pQTLs are target-dependent**

182 We collapsed pQTLs discovered by either platform using a distance-based threshold ( $\pm 500$ kb, **Fig. 4**)  
 183 to define shared ('cross-platform') versus 'platform-specific' pQTLs. This procedure resulted in 479  
 184 (N=333 in *cis*, N=146 *trans*, 390 protein targets, **Supplementary Tab. 4**) genomic region - protein



185 target combinations for which we had sufficient statistical power to replicate effects, that is, pQTLs  
186 observed in the larger SomaScan study that had at least a  $p\text{-value} < 10^{-5}$  when restricting the analysis  
187 to the sample of 485 participants with overlapping measurements (see **Methods**).

188 We applied the following criteria to consider a pQTL/genomic region to be shared across both  
189 platforms: 1) genome-wide significance in either discovery approach of the same SNV or a proxy in  
190 high LD ( $R^2 > 0.6$ ) and/or sufficient effect strength to be detected in the smaller Olink sample, and 2)  
191 to be directionally concordant (**Fig. 4**). We further performed a regional look-up ( $\pm 500\text{kB}$ ) if the  
192 regional sentinels for the SomaScan assay and Olink were not in LD with the respective lead variant  
193 and tested if a conditionally independent pQTL in the same region may align (**Fig. 4**). We identified  
194 306 (63.9%) cross-platform genomic region - protein target associations with approximately similar  
195 fractions for *cis* and *trans*-pQTLs (**Fig. 4**). Among those were 7 regions for which two independent  
196 pQTLs ( $R^2 < 0.1$ ) were shared between SomaScan and Olink, but with different ranking in effect  
197 strengths, and further 13 regions for which out of two SomaScan signals only the secondary signal at  
198 the locus was also seen with Olink. The remaining 36.1% genomic region - protein target associations  
199 were platform-specific because they were either 1) only evident for one of the two assays (24.6%,  
200  $N=59$  for the SomaScan assay and  $N=59$  for Olink), or 2) showed evidence for distinct genetic signals  
201 at the same locus (10%, 48 pairs).

202 We identified seven pairs for which the lead pQTL was shared but with opposite directions of effect  
203 for the same protein target or its isoforms (**Supplementary Fig. 2 and Supplementary Tab. 4**). For  
204 instance, the missense variant rs1859788 (p.G78R, AF=31.7% for the A-allele) in *PILRA* was the lead  
205 *cis*-pQTL for Paired immunoglobulin-like type 2 receptor alpha (PILRA) for the Olink measure ( $\beta = -$   
206  $0.74$ ,  $p < 3.48 \times 10^{-29}$ ) and we found positive associations with two SOMAmer reagents targeting  
207 soluble isoforms of the same protein (6402-8 targeting isoform FDF03-deltaTM ( $\beta = 1.26$ ,  
208  $p < 2.67 \times 10^{-5193}$ ) and 10816-150 targeting isoform FDF03-M14 ( $\beta = 1.26$ ,  $p < 1.53 \times 10^{-5360}$ ), but not the  
209 SOMAmer reagent designed to target the extra-cellular domain of the canonical protein (8825-4,  
210  $\beta = 0.004$ ,  $p = 0.75$ ). Using statistical colocalisation we provide strong evidence of a genetic signal  
211 shared between all three different protein measures and Alzheimer's disease (**Supplementary Tab. 5**  
212 **and Supplementary Fig. 3**), in line with the A-allele of rs1859788 having been identified as  
213 protective for Alzheimer's disease. PILRA is an inhibitory receptor expressed in dendritic and myeloid  
214 cells<sup>22</sup> and p.G78R was shown to reduce signalling *via* reduced ligand binding, likely modulating  
215 microglia migration and activation in the brain<sup>23</sup>. G78R is located in the extracellular-domain  
216 common to all three forms of PILRA<sup>22</sup>. Therefore, the positive effect directions of the SOMAmer  
217 reagents targeting the two isoforms in the absence of an association with the canonical protein

218 suggest aptamer binding affinity introduced by p.G78R being restricted to the soluble isoform.  
219 However, our results cannot distinguish which isoform the polyclonal Olink antibodies target and  
220 whether the inverse association reflects reduced binding affinity to the variant protein of at least  
221 some of them. We identified similar examples with possible downstream consequences for  
222 phenotypic interpretation, including Hepatoma-derived growth factor and HDL-cholesterol levels or  
223 Intracellular adhesion molecule 1 and lymphocyte cell count (**Supplementary Tab. 5**).

224 To test the influence of an unbalanced design, we performed a sensitivity analysis including 307  
225 genomic region - protein targets pairs (N=67 *cis*, N=240 *trans*, N=76 protein targets, **Supplementary**  
226 **Tab. 5**) overlapping with the SCALLOP CVD-I panel GWAS summary statistics. We identified 120  
227 (39.1%) of the pairs as cross-platform, with higher rates in *cis* (55.2%) compared to *trans* (24.5%)  
228 (**Fig. 4**). The higher fraction of platform-specific pairs in *trans* (157 out of 187, 83.9%) might be best  
229 explained by two factors. Firstly, variants in *trans* might increase DNA-binding affinity of abundant  
230 circulating proteins such as complement factor H (rs1061170 within *CFH*) or Butyrylcholinesterase  
231 (rs1803274 within *BCHE*) possibly interfering with SOMAmer reagents<sup>19</sup>, and, secondly, reflect  
232 study-specific handling of blood samples like rs3443671 within *NLRP12*, which might only be  
233 identified as a pQTL as a result of white blood cell lysis. Out of the 140 platform-specific *trans*-pQTLs,  
234 26 and 25, respectively, were likely attributable to those reasons.

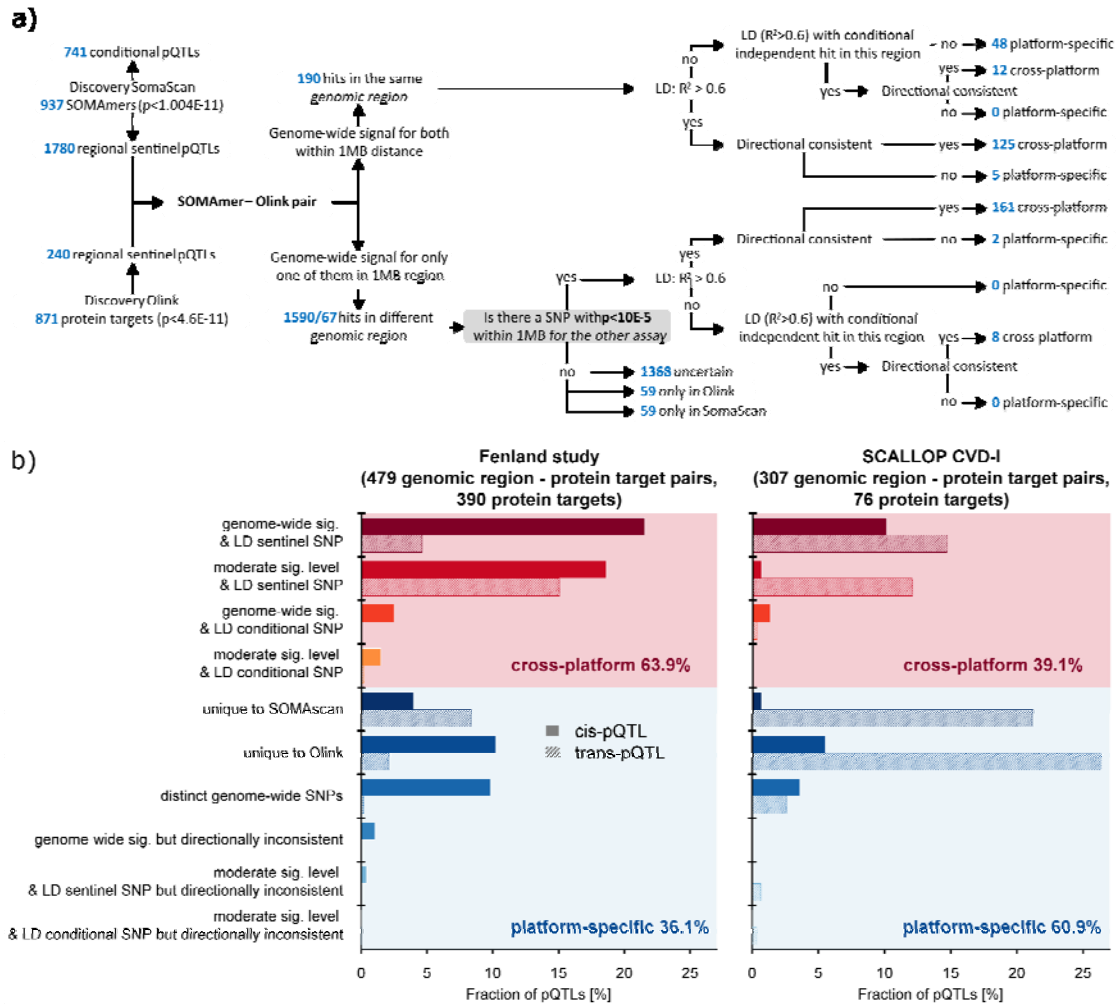

235  
236

237 **Figure 4 Cross-platform agreement of genomic region – protein target associations.** **a** Workflow to  
 238 determine shared ('cross-platform') and platform-specific effects of protein-quantitative trait loci  
 239 (pQTLs) between SomaScan and Olink based in the Fenland study. **b** Summary of platform  
 240 agreement for 479 genomic region – protein target associations with sufficient power among the  
 241 Fenland subsample with available Olink measures (left plot) and 307 genomic region – protein target  
 242 associations with sufficient power in the Fenland SomaScan study and the SCALLOP CVD-I  
 243 consortium (right plot).

244

#### 245 **Identification of factors for cross-platform pQTLs**

246 To identify factors that are associated with pQTLs that are shared across platforms as opposed to  
 247 those that are platform-specific, we used logistic regression models to systematically test the odds  
 248 of platform-specificity for 22 factors, including functional annotation of variants, associations with  
 249 diverse phenotypic traits, gene expression QTL (eQTL), and protein characteristics. We considered  
 250 three control groups: 1) protein targets with distinct pQTLs in the same genomic region, 2) pQTLs

251 unique to the SomaScan assay, and 3) pQTLs unique to the Olink assay (**Fig. 5 and Supplementary**  
252 **Fig. 4 and Supplementary Tab. 7-9**). In general, the likelihood of a pQTL being shared across  
253 platforms was greater compared to either of the three control groups and in both the Fenland and  
254 SCALLOP data when the correlation between measurements ('observational correlation') and the  
255 binding affinity of the SOMAmer reagent was higher (**Fig. 5 and Supplementary Fig. 4**).

256 We identified a few factors that were significantly associated only when using specific control  
257 groups. For example, LD with a (benign) PAV decreased the odds for cross-platform pQTLs only when  
258 comparing to SomaScan-specific pQTLs, which might be best explained by the putative change in  
259 shape of the protein target among carriers of the alternative allele of PAVs and the reliance of  
260 SOMAmer reagents on a conserved shape of the protein target (**Supplementary Tab. 10**). Strong  
261 effects of single genetic variants on assay results, indicated by the factor "%-outlier SomaScan", may  
262 even mask associations that would otherwise be expected from the protein target, that is only seen  
263 with the Olink assay. Further, colocalization with (cis)-eQTLs and phenotypic traits was associated  
264 with a higher likelihood of cross-platform pQTLs comparing to SomaScan-specific and distinct pQTLs,  
265 respectively (**Fig. 5**).

266

267

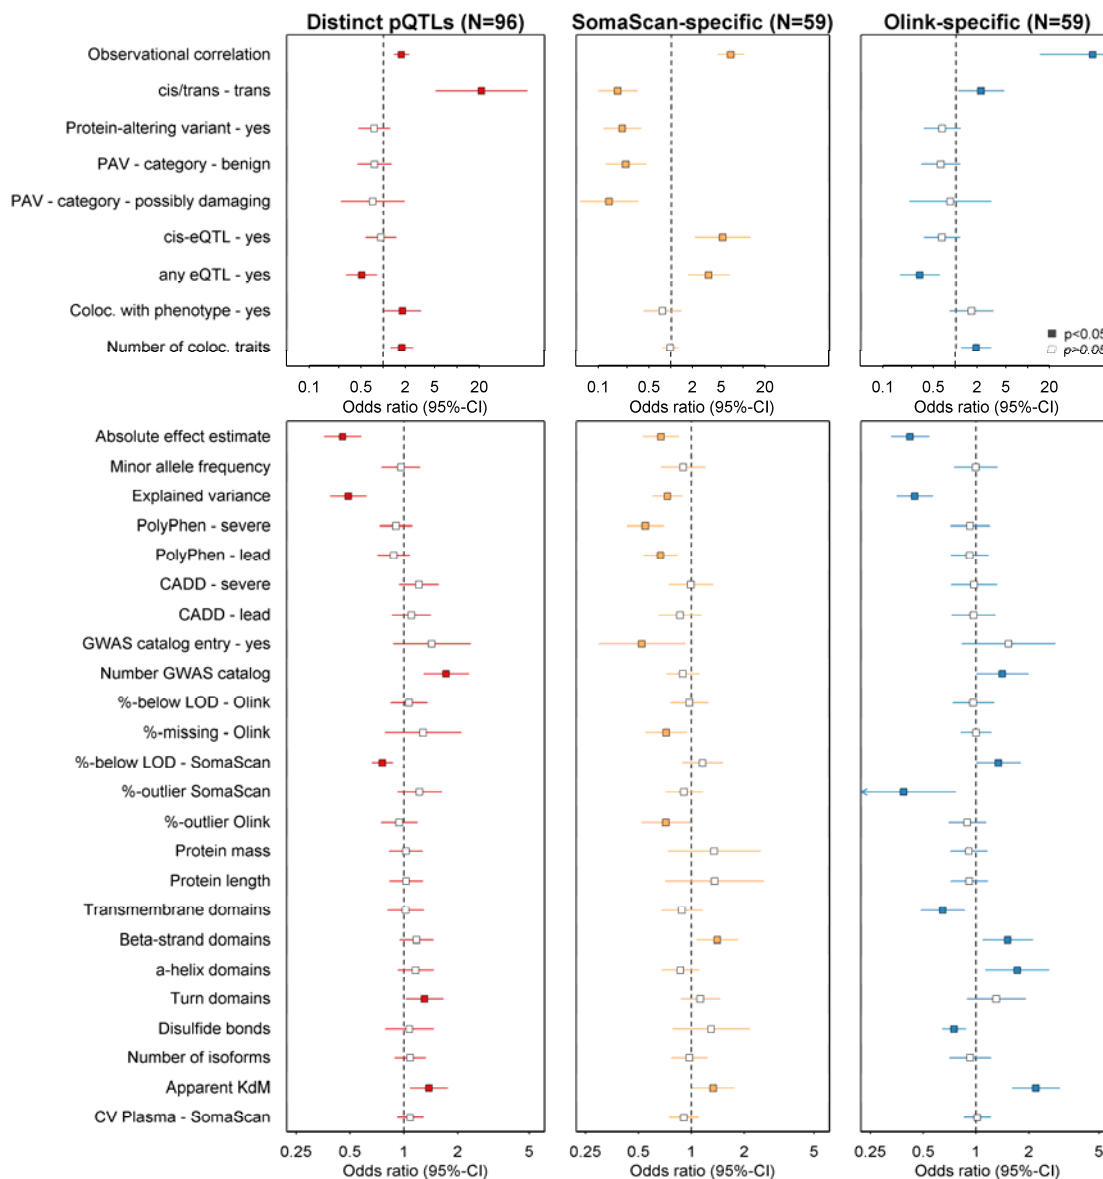

268

269 **Figure 5 Factors associated with pQTLs that are shared across platforms compared to three sets of**  
 270 **platform-specific controls.** Odds ratios and 95%-confidence intervals for factors associated with  
 271 cross-platform protein quantitative trait loci (pQTL) across the SomaScan v4 and Olink assays. The  
 272 panels are based on 540 variant – protein target pairs (306 shared, 234 platform-specific) with  
 273 sufficient power for replication in the Fenland sample. PAV = protein altering variant; eQTL =  
 274 expression quantitative trait loci; Coloc. = colocalisation; GWAS = genome-wide association analysis;  
 275 LOD = limit of detection; KdM = estimated apparent dissociation constant (Kd) of SOMAmer reagents  
 276 in molar units (M)

277

278 Platform-specific pQTLs with strong evidence for colocalization with a phenotypic trait may provide  
 279 evidence about the biological relevance of the pQTL. Therefore, exploring those associations may  
 280 provide insights that would otherwise be hidden if only one platform was analysed. Out of 17 and 47

281 *cis*-pQTLs unique to the SomaScan and the Olink assay, respectively, in the Fenland study, three and  
282 14 had either been reported in the GWAS catalog or colocalised in a phenome-wide scan  
283 (**Supplementary Tab. 7-8**). While we cannot completely rule out that *cis*-pQTLs attributed solely to  
284 the SomaScan assay might not have been observed with Olink due to limited samples size, the 14 *cis*-  
285 pQTLs unique to Olink which are demonstrable in only 485 samples suggest that these are strong  
286 phenotypic links. For instance, the *cis*-pQTLs rs11589479 (ADAM15) and rs34687326 (SLAMF8)  
287 colocalised (posterior probability for a shared genetic signal >90%) with Crohn's disease  
288 (**Supplementary Tab. 5**), of which the missense variant rs34687326 (p.Gly99Ser) within *SLAMF8* has  
289 been identified as a risk factor for inflammatory bowel disease as well<sup>24</sup>. We observed a similar  
290 distribution of unique *cis*-pQTLs in the larger SCALLOP comparison, with two and 15 *cis*-pQTLs  
291 unique to the SomaScan assay and SCALLOP (Olink), respectively, of which one (rs140934622 for IL-  
292 27 with the SomaScan assay, in LD,  $R^2=0.96$ , with a lead signal for intelligence<sup>25</sup>) and seven (e.g.,  
293 rs4512994 for sRANKL on Olink, which is a known susceptibility locus for bone mineral density<sup>26</sup>) had  
294 a link to phenotypic traits.

295 IL-27 is an inflammatory protein and encoded at the two distinct genes *IL27* (IL-27p28 cytokine  
296 subunit) and *EBI3* (soluble EBI3 essential for correct folding and secretion)<sup>27</sup>. We identify a  
297 SomaScan-specific variant located at *IL27* (rs140934622 on 16p11) and an Olink-specific variant at  
298 *EBI3* (rs4905 on 19p13), both of which were in strong LD ( $R^2>0.99$ ) with missense variants (rs181206  
299 - p.L119P and rs4740 - p.V201I). It is possible that both missense variants might: 1) differentially  
300 affect heterodimerization of the two different gene products required to build IL-27 or 2) both  
301 assays have a critical binding epitope on the respective subunit and binding of the affinity reagent is  
302 impaired by PAVs.

303 We considered the identification of secondary signals conditioning on the lead *cis*-pQTL as a strategy  
304 to overcome strong platform-specific pQTLs motivated by a subset of 12 protein targets for which  
305 not the lead but the secondary *cis*-pQTL was shared across platforms. For three out of those targets,  
306 this approach let to the observation of additional phenotypic associations, including IGFBP-3, for  
307 which a *cis*-pQTL colocalised (PP>92%) with systolic blood pressure, or FBLN3, which colocalised  
308 (PP>80%) with 24 anthropometric traits and operation codes related to hernia (**Supplementary Tab.**  
309 **S5**). Doing the same across 36 protein targets with *cis*-pQTLs unique to SomaScan and evidence for a  
310 secondary signal ( $p<5\times 10^{-8}$ ) revealed three protein targets with a high posterior probability of a  
311 shared genetic signal with phenotypes (PP>80%), including CD58 and primary biliary cirrhosis  
312 (**Supplementary Tab. S5**).

313 ***pQTLs account for measurement differences***

314 We identified 22 instances in which the correlation coefficient between measurements of the same  
315 protein target across both platforms significantly differed by genotype (false discovery rate<20% for  
316 an interaction term), including pQTLs in *cis* and *trans* (**Fig. 6**). That is, once carriers of the minor or  
317 major allele were excluded, the correlation coefficient between both assays improved. For example,  
318 stratifying observational correlations by the two weakly related ( $R^2=0.23$ ,  $D'=0.93$ ) lead *cis*-pQTLs for  
319 YKL-40 (rs2071579 - SomaScan, rs4950928 - Olink) raised the correlation coefficients across all  
320 categories up to 0.95 (range: 0.56 - 0.95) for carriers of the minor C allele (MAF=45.7%) of rs2071579  
321 (**Fig. 6**). Rs2071579 is in LD with a possibly damaging missense variant (rs88063,  $R^2=0.99$ , CADD score  
322 = 22.9, p.R145G), located at a predicted protein-protein interaction site in a highly conserved region  
323 of the protein. However, none of the pQTLs has been genetically linked to phenotypes other than  
324 the protein itself.

325 While such findings in *cis* are likely to indicate possible interference with binding epitopes, variants  
326 in *trans* act through various pathways (**Supplementary Tab. 10**). For example, variants mapping to  
327 ubiquitously expressed glycosyltransferases may act through alerted glycosylation of protein targets  
328 affecting the accessibility for affinity reagents. We observed two such examples, namely rs281379  
329 (associated with TECK and in LD,  $R^2=0.83$ , with a missense variant in *FUT2*) and rs779860630  
330 (associated with SARP-2 and intronic of *ABO*) mapping to genes encoding glycosyltransferases.  
331 Another possibility is a higher affinity for RNA or DNA binding of the gene product conferred by the  
332 genetic variant, similar to what was discussed previously for variants mapping to *CFH* and *BCHE*. We  
333 observed rs9501393 (MAF=13.5%) modulating the correlation coefficient of Endothelin-converting  
334 enzyme 1 (**Fig. 6**). Rs9501393 is in strong LD ( $R^2=0.94$ ) with a missense variant of uncertain  
335 significance in *SKIV2L* (rs449643, p.A1071V) encoding an RNA helicase, a protein with high affinity to  
336 bind to RNA or single-stranded DNA oligomers.

337 We next identified factors that influenced measurement differences at the individual participant  
338 data level, considering pQTLs as well as phenotypic measures that could have an impact on protein  
339 abundances, namely age, sex, body mass index (BMI), estimated glomerular filtration (eGFR;  
340 calculated from serum creatinine, age, and sex), and plasma alanine transaminase activities (ALT).  
341 The combination of all factors explained a median amount of 5.6% (IQR: 3.5% - 9.2%) of the  
342 differences in measurements reaching values of up to 69.4% for YKL-40 (**Fig. 6 and Supplementary**  
343 **Tab. 11**). For 211 (23%) out of 814 protein targets with at least one pQTL, the pQTL accounted for  
344 most of the explained variance (median: 1.0%, IQR: 0.2% - 3.4%), including 85 protein targets with  
345 >10%. The strong contribution of certain genetic variants aligns with the results for platform-specific  
346 *cis*- and *trans*-pQTLs outlined above.

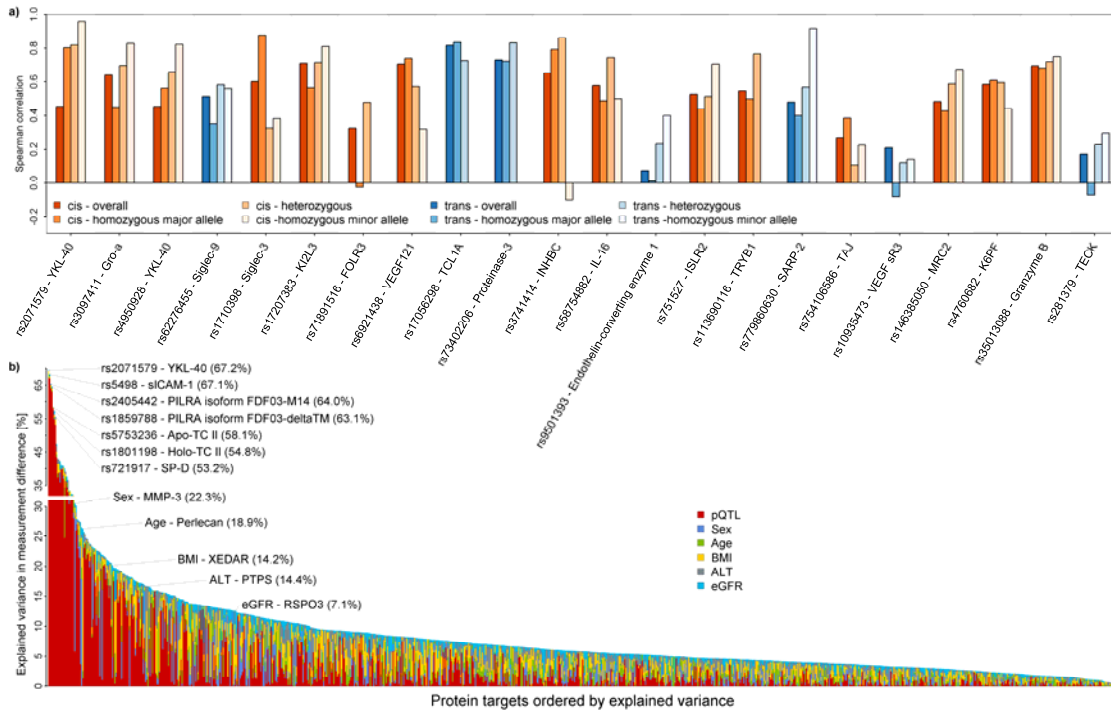

347  
348

349 **Figure 6 Genetic variants modulate correlation coefficients and explain measurement differences**  
 350 **between both assays. a)** Spearman correlation coefficients stratified by genotype. The first bar in  
 351 each column indicates the overall correlation, and the three successive bars indicate the correlation  
 352 among homozygous carriers of the major allele, heterozygous carriers, and homozygous carriers of  
 353 the minor allele (if any). Colours indicate whether the pQTL was in *cis* (orange) or *trans* (blue).  
 354 Protein target – pQTL pairs were selected based on a linear regression model (see Main text). **b)**  
 355 Protein targets ordered by the amount of variance explained in the differences between  
 356 measurements. Contribution of protein quantitative trait loci (pQTL), age, sex, body mass index  
 357 (BMI), plasma alanine aminotransferase activities (ALT), and estimated glomerular filtration rate  
 358 (eGFR) are given in colours. Selected protein targets are annotated.

359

## 360 DISCUSSION

361 Identification of DNA sequence variants modulating protein levels or activities and shared with  
 362 disease loci can identify disease-causing mechanisms and help to prioritize new and repurpose  
 363 existing drug targets<sup>10</sup>. To inform and advance such strategies, comparison across different  
 364 measurement techniques can not only validate identified signals but help to better understand the  
 365 potential biological relevance of platform-specific signals. Broad, systematic assessment of this  
 366 across many protein targets has until now been hindered by limited overlap across different  
 367 proteomic platforms. Previous smaller scale studies<sup>3,5,18</sup> have performed unidirectional validation of  
 368 pQTLs for a selected set of protein targets and reported inflated correlation estimates due to missing  
 369 alignment of effect directions to the protein increasing or decreasing allele, thereby introducing an



370 artificially large reference range. We provide the largest systematic identification and  
371 characterisation of pQTLs shared across platforms and those that are platform-specific pQTLs based  
372 on reciprocal, that is, bidirectional assessment of the two most comprehensive techniques covering  
373 871 overlapping protein targets. We show that the majority of pQTLs are shared across platforms  
374 (64%) but with substantially lower correlations than previously reported in *cis* and *trans*. We identify  
375 factors associated with platform-specific pQTLs for both platforms, which can directly help to inform  
376 strategies for prioritising pQTLs in academic and pharmaceutical efforts that have used either  
377 platform at scale, in particular for the thousands of protein targets only assayed by the Somalogic  
378 platform and providing unprecedented breadth for discovery studies.

379 We provide multiple examples for platform-specific pQTLs with strong evidence of a shared disease  
380 signal, which, in case of the SomaScan assay, could suggest a biological link *via* the shape of the  
381 protein rather than an effect mediated by the abundance of the protein target (**Supplemental Tab.**  
382 **10**). This has important implications for protein level based casual inference techniques such as  
383 Mendelian randomization, where genetic instruments acting in *cis* are used to typically proxy  
384 abundance rather than function of the encoded protein, and where such findings can be used for  
385 drug target validation, if the encoded protein is druggable. However, strong platform-specific signals  
386 can also hide signals that would otherwise be shared across platforms. We demonstrate that the use  
387 of conditional association statistics, upon the lead pQTL in the region, provides a strategy to recover  
388 relevant biological information.

389 We identify several characteristics affecting the correlation between both assays, including technical  
390 variation, certain protein characteristics, and a strong effect of genetic variants (**Fig. 7**). However,  
391 the lack of full technical details of the assays that are not in the public domain as they are  
392 commercially sensitive and general methodological differences between the assays did not permit a  
393 more rigorous assessment of non-biological factors. This includes the similarity of synthetic peptides  
394 used to select bindings reagents or a measure of binding affinity for antibodies, which might likely  
395 yield additional insights into possible differences. Incorporation of complementary techniques such  
396 as mass spectrometry may help to resolve some of these issues<sup>28</sup>, for example by linking a pQTL to  
397 an actually measured peptide sequence, which would provide important scientific opportunities if  
398 the approach can be applied at scale. In addition, structural characterization of proteins bound to  
399 affinity reagents using mass spectrometry has the potential to identify the concrete protein species  
400 bound to the affinity reagent<sup>4,18</sup>.

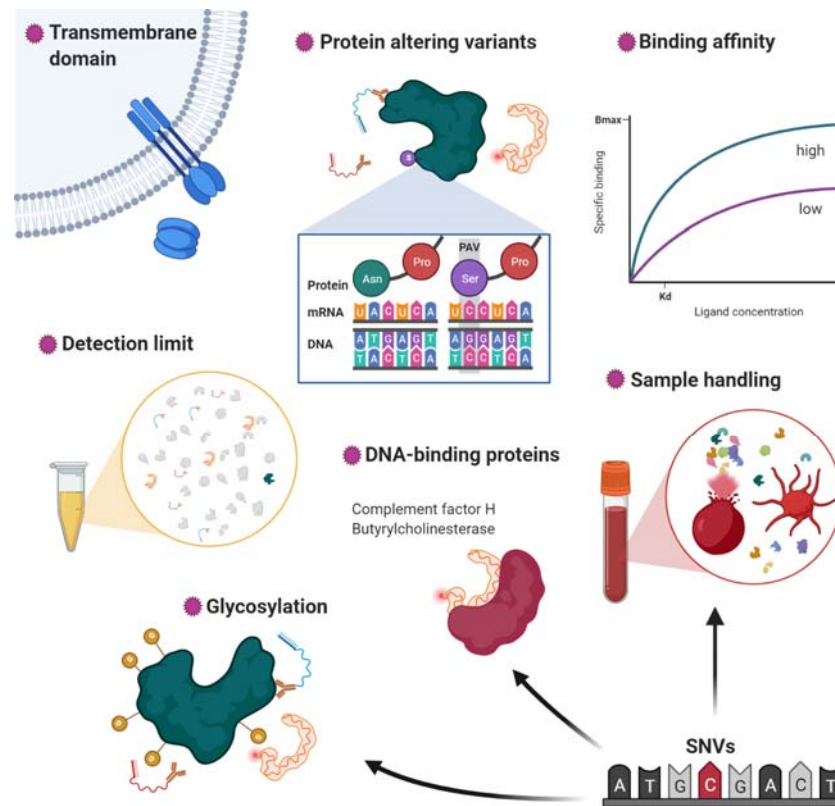

401

402 **Figure 7 Sources of variation.** Graphical summary of factors contributing to variation in the affinity-  
403 based discovery of the plasma proteome. PAV = protein altering variant; SNV = single nucleotide  
404 variant

405

## 406 METHODS

### 407 *MRC Fenland cohort*

408 The Fenland study is a population-based cohort of 12,435 participants, predominantly of White  
409 British ancestry, born between 1950 and 1975 who underwent detailed phenotyping at a baseline  
410 visit between 2005 and 2015. Participants were recruited from general practice surgeries in the  
411 Cambridgeshire region of the UK. Exclusion criteria were clinically diagnosed diabetes mellitus,  
412 inability to walk unaided, terminal illness, clinically diagnosed psychotic disorder, pregnancy, or  
413 lactation. The study was approved by the Cambridge Local Research Ethics Committee (NRES  
414 Committee – East of England Cambridge Central, ref. 04/Q0108/19) and all participants provided  
415 written informed consent. Participants in the study were on average 48.6 years old (standard  
416 deviation: 7.5 years) and 53.4% of them were female, as previously described<sup>29</sup>.

### 417 *Proteomic measurements*

418 Proteomic profiling of fasting EDTA plasma samples from 12,084 Fenland Study participants  
419 collected at the baseline visit was performed by SomaLogic Inc. (Boulder, US) using an aptamer-  
420 based technology (SomaScan v4 assay). Relative protein abundances of 4,775 human protein targets  
421 were evaluated by 4,979 aptamers (SomaLogic V4) and a detailed description can be found  
422 elsewhere<sup>20</sup>. Briefly, the SomaScan assay utilises a library of short single-stranded DNA molecules,  
423 which are chemically modified to specifically bind to protein targets and the relative amount of  
424 aptamers binding to protein targets is determined using DNA microarrays. To account for variation in  
425 hybridization within runs, hybridization control probes are used to generate a hybridization scale  
426 factor for each sample. To control for total signal differences between samples due to variation in  
427 overall protein concentration or technical factors such as reagent concentration, pipetting or assay  
428 timing, a ratio between each aptamer's measured value and a reference value is computed, and the  
429 median of these ratios is computed for each of the three dilution sets (40%, 1% and 0.005%) and  
430 applied to each dilution set. Samples were removed if they were deemed by SomaLogic to have  
431 failed or did not meet our acceptance criteria of 0.25-4 for all scaling factors. In addition to passing  
432 SomaLogic QC, only human protein targets were taken forward for subsequent analysis (4,979 out of  
433 the 5284 aptamers). Aptamers' target annotation and mapping to UniProt accession numbers as well  
434 as Entrez gene identifiers were provided by SomaLogic.

435 We estimated a limit of detection (LOD) for each SOMAmer reagent using a "robust estimate"  
436 method suggested by SomaLogic, based on the median plus 4.9 \* median absolute deviation (MAD)  
437 signal of the blank (buffer) samples. We further defined outliers for SOMAmer and Olink  
438 measurements as being outside the median  $\pm 5$ \*MAD based on test sample signals and used the  
439 fraction of outliers as a variable to explain variation.

440 Plasma samples for a subset of 500 Fenland participants were additionally measured using 12 Olink  
441 92-protein panels using proximity extension assays<sup>16</sup>. Of the 1104 Olink proteins, 1069 were unique  
442 (n=35 on >1 panel, average correlation coefficient 0.90). We imputed values below the detection  
443 limit of the assay using raw fluorescence values. Protein levels were normalized ('NPX') and  
444 subsequently log2-transformed for statistical analysis. A total of 15 samples were excluded based on  
445 quality thresholds recommended by Olink, leaving 485 samples for analysis.

#### 446 *Protein target mapping*

447 We mapped each candidate protein to its UniProt-ID<sup>30</sup> and used those to select mapping SOMAmer  
448 reagents and Olink measures based on annotation files provided by the vendors. We further queried

449 the UniProt database to obtain protein domain information and other characteristics of overlapping  
450 protein targets.

#### 451 *Statistical analysis*

452 We used rank-based inverse normal transformations to make protein measurements between both  
453 technologies comparable and reported Spearman rank-based and Pearson correlation coefficients as  
454 a measure of concordance between platforms.

455 To derive factors explaining the Spearman correlation gradient across protein targets, we created a  
456 matrix with meta-information for each protein target, including information about technical  
457 characteristics of each platform as well as characteristics of the protein target (**Fig. 2**) and used those  
458 as input for a Random-forest based feature selection approach, called Boruta-feature selection<sup>31</sup>.  
459 Briefly, this method employs multiple rounds of Random-forest generation and includes so-called  
460 shadow variables, which are permuted versions of the original input variables, to derive test  
461 statistics for the variable importance measure.

#### 462 *Genotyping and imputation*

463 Fenland participants were genotyped using one of three genotyping arrays: the Affymetrix UK  
464 Biobank Axiom array (OMICs, N=8994), Illumina Infinium Core Exome 24v1 (Core-Exome, N=1060)  
465 and Affymetrix SNP5.0 (GWAS, N=1402). Samples were excluded for the following reasons: 1) failed  
466 channel contrast (DishQC <0.82); 2) low call rate (<95%); 3) gender mismatch between reported and  
467 genetic sex; 4) heterozygosity outlier; 5) unusually high number of singleton genotypes or 6)  
468 impossible identity-by-descent values. Single nucleotide polymorphisms (SNPs) were removed if: 1)  
469 call rate < 95%; 2) clusters failed Affymetrix SNPolisher standard tests and thresholds; 3) MAF was  
470 significantly affected by plate; 4) SNP was a duplicate based on chromosome, position and alleles  
471 (selecting the best probeset according to Affymetrix SNPolisher); 5) Hardy-Weinberg equilibrium  
472  $p < 10^{-6}$ ; 6) did not match the reference or 7) MAF=0.

473 Autosomes for the OMICS and GWAS subsets were imputed to the HRC (r1) panel using IMPUTE4<sup>32</sup>,  
474 and the Core-Exome subset and the X-chromosome (for all subsets) were imputed to HRC.r1.1 using  
475 the Sanger imputation server<sup>33</sup>. All three arrays subsets were also imputed to the  
476 UK10K+1000Gphase3<sup>34</sup> panel using the Sanger imputation server in order to obtain additional  
477 variants that do not exist in the HRC reference panel. Variants with MAF < 0.001, imputation quality  
478 (info) < 0.4 or Hardy Weinberg Equilibrium  $p < 10^{-7}$  in any of the genotyping subsets were excluded  
479 from further analyses.

480 *GWAS and meta-analysis*

481 After excluding ancestry outliers and related individuals, 10,708 Fenland participants had both  
482 phenotypes and genetic data for the GWAS (OMICS=8,350, Core-Exome=1,026, GWAS=1,332).  
483 Within each genotyping subset, aptamer abundances were transformed to follow a normal  
484 distribution using the rank-based inverse normal transformation. Transformed aptamer abundances  
485 were then adjusted for age, sex, sample collection site and 10 principal components in STATA v14  
486 and the residuals used as input for the genetic association analyses. Test site was omitted for protein  
487 abundances measured by Olink as those were all selected from the same test site. Genome-wide  
488 association was performed under an additive model using BGENIE (v1.3)<sup>32</sup>. Results for the three  
489 genotyping arrays were combined in a fixed-effects meta-analysis in METAL<sup>35</sup>. Following the meta-  
490 analysis, 17,652,797 genetic variants also present in the largest subset of the Fenland data (Fenland-  
491 OMICS) were taken forward for further analysis.

492 For each protein target, we used a genome-wide significance threshold of  $1.004 \times 10^{-11}$  (SomaScan) or  
493  $4.5 \times 10^{-11}$  (Olink) and defined non-overlapping regions by merging overlapping or adjoining 1Mb  
494 intervals around all genome-wide significant variants (500kb either side), treating the extended MHC  
495 region (chr6:25.5–34.0Mb) as one region. We classified pQTLs as *cis*-acting instruments if the variant  
496 was less than 500kb away from the gene body of the protein encoding gene.

497 We performed conditional analysis as implemented in the GCTA software using the *s/ct* option for  
498 each genomic region - aptamer pair identified. We used a collinear cut-off of 0.1 and a p-value below  
499  $5 \times 10^{-8}$  to identify secondary signals in each region. As a quality control step, we fitted a final model  
500 including all identified variants for a given genomic region using individual level data in the largest  
501 available data set ('Fenland-OMICS') and discarded all variants no longer meeting genome-wide  
502 significance.

503 To facilitate comparison between SomaScan and Olink, we repeated genetic variant – protein target  
504 associations within the same sample for which Olink was available. To account for differing sample  
505 sizes between the SomaScan data in Fenland and the varying sample sizes within SCALLOP, we  
506 recomputed p-values holding the beta estimates constant and re-estimated standard errors using  
507 the respective sample size. We considered a predicted p-value threshold of  $10^{-5}$  to include pQTLs for  
508 consistency assessment in case there was evidence for a genome-wide signal from either approach.

509 *Annotation of pQTLs*

510 For each identified pQTL we first obtained all SNPs in at least moderate LD ( $r^2 > 0.1$ ) using PLINK  
511 (version 2.0) and queried comprehensive annotations using the variant effect predictor software<sup>36</sup>  
512 (version 98.3) using the *pick* option. For each *cis*-pQTL we checked whether either the variant itself  
513 or a proxy in the encoding gene ( $r^2 > 0.1$ ) is predicted to induce a change in the amino acid sequence  
514 of the associated protein, so-called protein altering variants (PAVs).

#### 515 *Phenome-wide association analyses*

516 To enable linkage to reported GWAS-variants we downloaded all SNPs reported in the GWAS  
517 catalog<sup>37</sup> (19/12/2019) and pruned the list of variant-outcome associations manually to omit  
518 previous protein-wide GWASs. For each SNP identified in the present study we tested whether the  
519 variant or a proxy in LD ( $r^2 > 0.8$ ) has been reported to be associated with other outcomes previously.

520 We used the Open GWAS database<sup>38</sup> to query for each genomic region association with non-  
521 proteomic phenotypes and tested for a shared genetic signal between a protein target and a  
522 phenotype with at least suggestive evidence ( $p < 10^{-6}$ ) using statistical colocalisation<sup>39</sup>. We considered  
523 a posterior probability of 80% as highly likely. We repeated this analysis for all *cis*-regions from the  
524 SomaScan-based discovery with evidence for a secondary signal ( $p < 5 \times 10^{-8}$ ) by creating conditional  
525 summary statistics using the lead signal in the locus as additional covariate. We computed  
526 conditional association statistics using the *cond* option from GCTA-cojo to align with the  
527 identification of secondary signals.

#### 528 *Expression quantitative trait loci*

529 We obtained lead eQTLs from the most recent release of the GTEx project v8<sup>40</sup> across all 49 tissues  
530 and mapped *cis*-pQTLs to *cis*-eQTLs by LD ( $R^2 > 0.8$ ) restricting to the respective protein-encoding  
531 gene. We further generated a simple LD-based mapping ( $R^2 > 0.8$ ) considering any overlap between  
532 lead pQTLs and eQTLs to allow for incorporation of *trans*-pQTLs.

#### 533 *Analysis of genetic associations*

534 We used logistic regression models to test whether variant or protein characteristics as well as  
535 technical factors were associated with the likelihood of a shared genetic region. We stratified these  
536 analyses by having a common set of shared control regions but three different sets of platform-  
537 specific regions, including regions with evidence for distinct signals within the same region ( $\pm 500$ kb)  
538 or regions only seen when using either of the two assay platforms. We derived robust standard  
539 errors using the sandwich method. We applied log-transformation ('apparent Kd') or square root-

540 transformation (number of colocalising traits, absolute effect estimate, and predicted explained  
541 variance) to reduce the impact of highly skewed factors.

542 To decompose the variance of measurement differences we computed the differences in rank-  
543 transformed measurements between SomaScan and Olink for each overlapping protein target. We  
544 used this variable as outcome for a variance decomposition model as implemented in R package  
545 *variancePartition* using a corresponding pQTL, age, sex, body mass index, plasma alanine  
546 aminotransferase, and estimated glomerular filtration rate as explanatory variables. We selected the  
547 only one pQTL for each overlapping pair based on a simple linear regression model explaining the  
548 differences in measurements.

549 Finally, we used a linear regression model to test whether the association between the Olink  
550 measure (outcome) and the SomaScan measure (exposure) differed by genotype of associated  
551 pQTLs. The resulting p-value for the interaction term between the SomaScan variable and the pQTL  
552 can be interpreted as a test of differential correlation coefficients based on genotype. We accounted  
553 for multiple testing by adopting a false discovery rate of 20%. We took a permissive approach given  
554 the small sample size (N=485) and the generally low statistical power to detect interaction terms.

555 We used R version 3.6.0 (R Foundation for statistical computing, Vienna, Austria) and BioRender.com  
556 for visualization of results.

#### 557 **DATA AVAILABILITY**

558 Information about the Fenland cohort is available at the study website ([https://www.mrc-  
559 epid.cam.ac.uk/research/studies/fenland/information-for-researchers/](https://www.mrc-epid.cam.ac.uk/research/studies/fenland/information-for-researchers/)), which includes a link to the  
560 MRC Epidemiology Unit metadata access portal (<https://epi-meta.mrc-epid.cam.ac.uk/>) which  
561 describes how data can be accessed by bona fide researchers for specified scientific purposes. Data  
562 will either be shared through an institutional data sharing agreement or arrangements will be made  
563 for analyses to be conducted remotely without the necessity for data transfer. Publicly available  
564 summary statistics for look-up and colocalisation of pQTLs were obtained from  
565 <https://gwas.mrcieu.ac.uk/> and <https://www.ebi.ac.uk/gwas/>. We obtained genome-wide summary  
566 statistics for 90 protein targets from Folkersen et al.<sup>8</sup>, which are also available from the GWAS  
567 catalog (GCST90011994-GCST90012083).

#### 568 **ACKNOWLEDGEMENT**

569 The Fenland Study (10.22025/2017.10.101.00001) is funded by the Medical Research Council  
570 (MC\_UU\_12015/1). We are grateful to all the volunteers and to the General Practitioners and

571 practice staff for assistance with recruitment. We thank the Fenland Study Investigators, Fenland  
572 Study Co-ordination team and the Epidemiology Field, Data and Laboratory teams. We further  
573 acknowledge support for genomics from the Medical Research Council (MC\_PC\_13046). Proteomic  
574 measurements were supported and governed by a collaboration agreement between the University  
575 of Cambridge and Somalogic. JCZ is supported by a 4-year Wellcome Trust PhD Studentship and the  
576 Cambridge Trust, CL, EW, and NJW are funded by the Medical Research Council (MC\_UU\_12015/1).  
577 NJW is a NIHR Senior Investigator. ADH is an NIHR Senior Investigator and supported by the UCL  
578 Hospitals NIHR Biomedical Research Centre and the UCL BHF Research Accelerator (AA/18/6/34223).  
579 We thank Philippa Pettingill, Ida Grundberg, Klev Diamanti, and Andrea Ballagi for advice and  
580 comments on an earlier draft of this manuscript.

#### 581 **AUTHOR CONTRIBUTIONS**

582 MP and CL designed the analysis and drafted the manuscript. MP, EW, and JL analysed the data. JCZ  
583 and EO provided bioinformatic characterization of protein targets and mapped pQTLs to eQTLs. NK  
584 and EO performed quality control of proteomic measurements. ADH and SAW provided critical  
585 review and intellectual contribution to the discussion of results. NJW is PI of the Fenland cohort. All  
586 authors contributed to the interpretation of the results and critically reviewed the manuscript.

#### 587 **COMPETING INTERESTS**

588 SAW is an employee of SomaLogic. The remaining authors declare no competing interests.

589



590 **REFERENCES**

- 591 1. Suhre, K., McCarthy, M. I. & Schwenk, J. M. Genetics meets proteomics: perspectives for large  
592 population-based studies. *Nat. Rev. Genet.* 1–19 (2020) doi:10.1038/s41576-020-0268-2.
- 593 2. Deboever, C. *et al.* Medical relevance of protein-truncating variants across 337,205  
594 individuals in the UK Biobank study. *Nat. Commun.* **9**, 1–10 (2018).
- 595 3. Suhre, K. *et al.* Connecting genetic risk to disease end points through the human blood  
596 plasma proteome. *Nat. Commun.* **8**, (2017).
- 597 4. Emilsson, V. *et al.* Co-regulatory networks of human serum proteins link genetics to disease.  
598 *Science (80-. )*. **361**, 1–12 (2018).
- 599 5. Sun, B. B. *et al.* Genomic atlas of the human plasma proteome. *Nature* **558**, 73–79 (2018).
- 600 6. Yao, C. *et al.* Genome-wide mapping of plasma protein QTLs identifies putatively causal genes  
601 and pathways for cardiovascular disease. *Nat. Commun.* **9**, 3268 (2018).
- 602 7. Folkersen, L. *et al.* Mapping of 79 loci for 83 plasma protein biomarkers in cardiovascular  
603 disease. (2017) doi:10.1371/journal.pgen.1006706.
- 604 8. Folkersen, L. *et al.* Genomic and drug target evaluation of 90 cardiovascular proteins in  
605 30,931 individuals. *Nat. Metab.* **2**, 1135–1148 (2020).
- 606 9. Santos, R. *et al.* A comprehensive map of molecular drug targets. *Nat. Rev. Drug Discov.* **16**,  
607 19–34 (2016).
- 608 10. Zheng, J. *et al.* Phenome-wide Mendelian randomization mapping the influence of the plasma  
609 proteome on complex diseases. *Nat. Genet.* **52**, 1122–1131 (2020).
- 610 11. Nelson, M. R. *et al.* The support of human genetic evidence for approved drug indications.  
611 *Nat. Genet.* **47**, 856–860 (2015).
- 612 12. King, E. A., Davis, J. W. & Degner, J. F. Are drug targets with genetic support twice as likely to  
613 be approved? Revised estimates of the impact of genetic support for drug mechanisms on the  
614 probability of drug approval. *PLoS Genet.* **15**, e1008489 (2019).
- 615 13. Sudlow, C. *et al.* UK Biobank: An Open Access Resource for Identifying the Causes of a Wide  
616 Range of Complex Diseases of Middle and Old Age. *PLoS Med.* **12**, 1–10 (2015).
- 617 14. UK Biobank proteomics. <https://www.ukbiobank.ac.uk/learn-more-about-uk-bi>  
618 [https://www.ukbiobank.ac.uk/learn-more-about-uk-biobank/news/uk-biobank-launches-](https://www.ukbiobank.ac.uk/learn-more-about-uk-biobank/news/uk-biobank-launches-one-of-the-largest-scientific-studies)  
619 [one-of-the-largest-scientific-studies](https://www.ukbiobank.ac.uk/learn-more-about-uk-biobank/news/uk-biobank-launches-one-of-the-largest-scientific-studies) (2020).
- 620 15. Gold, L. *et al.* Aptamer-based multiplexed proteomic technology for biomarker discovery.  
621 *PLoS One* **5**, (2010).
- 622 16. Assarsson, E. *et al.* Homogenous 96-plex PEA immunoassay exhibiting high sensitivity,  
623 specificity, and excellent scalability. *PLoS One* **9**, (2014).
- 624 17. Joshi, A. & Mayr, M. In Aptamers They Trust. *Circulation* **138**, 2482–2485 (2018).
- 625 18. Raffield, L. M. *et al.* Comparison of Proteomic Assessment Methods in Multiple Cohort  
626 Studies. *Proteomics* **20**, (2020).

- 627 19. Pietzner, M. *et al.* Genetic architecture of host proteins involved in SARS-CoV-2 infection.  
628 *Nat. Commun.* **11**, 6397 (2020).
- 629 20. Williams, S. A. *et al.* Plasma protein patterns as comprehensive indicators of health. *Nat.*  
630 *Med.* **25**, 1851–1857 (2019).
- 631 21. Lichtenthaler, S. F., Lemberg, M. K. & Fluhrer, R. Proteolytic ectodomain shedding of  
632 membrane proteins in mammals—hardware, concepts, and recent developments. *EMBO J.*  
633 **37**, (2018).
- 634 22. Fournier, N. *et al.* FDF03, a Novel Inhibitory Receptor of the Immunoglobulin Superfamily, Is  
635 Expressed by Human Dendritic and Myeloid Cells. *J. Immunol.* **165**, 1197–1209 (2000).
- 636 23. Rathore, N. *et al.* Paired Immunoglobulin-like Type 2 Receptor Alpha G78R variant alters  
637 ligand binding and confers protection to Alzheimer’s disease. (2018)  
638 doi:10.1371/journal.pgen.1007427.
- 639 24. De Lange, K. M. *et al.* Genome-wide association study implicates immune activation of  
640 multiple integrin genes in inflammatory bowel disease. *Nat. Genet.* **49**, 256–261 (2017).
- 641 25. Savage, J. E. *et al.* Genome-wide association meta-analysis in 269,867 individuals identifies  
642 new genetic and functional links to intelligence. *Nat. Genet.* **50**, 912–919 (2018).
- 643 26. Stykarsdottir, U. *et al.* Multiple Genetic Loci for Bone Mineral Density and Fractures. *N. Engl.*  
644 *J. Med.* **358**, 2355–2365 (2008).
- 645 27. Müller, S. I. *et al.* A folding switch regulates interleukin 27 biogenesis and secretion of its  $\alpha$ -  
646 subunit as a cytokine. *Proc. Natl. Acad. Sci. U. S. A.* **116**, 1585–1590 (2019).
- 647 28. Petrera, A. *et al.* Multiplatform Approach for Plasma Proteomics: Complementarity of Olink  
648 Proximity Extension Assay Technology to Mass Spectrometry-Based Protein Profiling. *J.*  
649 *Proteome Res.* (2020) doi:10.1021/acs.jproteome.0c00641.
- 650 29. Lindsay, T. *et al.* Descriptive epidemiology of physical activity energy expenditure in UK adults  
651 (The Fenland study). *Int. J. Behav. Nutr. Phys. Act.* **16**, 126 (2019).
- 652 30. Bateman, A. *et al.* UniProt: The universal protein knowledgebase. *Nucleic Acids Res.* **45**,  
653 D158–D169 (2017).
- 654 31. Kursa, M. B. & Rudnicki, W. R. Feature selection with the boruta package. *J. Stat. Softw.* **36**,  
655 1–13 (2010).
- 656 32. Bycroft, C. *et al.* The UK Biobank resource with deep phenotyping and genomic data. *Nature*  
657 **562**, 203–209 (2018).
- 658 33. McCarthy, S. *et al.* A reference panel of 64,976 haplotypes for genotype imputation. *Nat.*  
659 *Genet.* **48**, 1279–1283 (2016).
- 660 34. Huang, J. *et al.* Improved imputation of low-frequency and rare variants using the UK10K  
661 haplotype reference panel. *Nat. Commun.* **6**, 1–9 (2015).
- 662 35. Willer, C. J., Li, Y. & Abecasis, G. R. METAL: Fast and efficient meta-analysis of genomewide  
663 association scans. *Bioinformatics* **26**, 2190–2191 (2010).
- 664 36. McLaren, W. *et al.* The Ensembl Variant Effect Predictor. *Genome Biol.* **17**, 1–14 (2016).

- 665 37. Buniello, A. *et al.* The NHGRI-EBI GWAS Catalog of published genome-wide association  
666 studies, targeted arrays and summary statistics 2019. *Nucleic Acids Res.* **47**, 1005–1012  
667 (2018).
- 668 38. Elsworth, B. *et al.* The MRC IEU OpenGWAS data infrastructure. *bioRxiv* 2020.08.10.244293  
669 (2020).
- 670 39. Giambartolomei, C. *et al.* Bayesian test for colocalisation between pairs of genetic association  
671 studies using summary statistics. *PLoS Genet.* **10**, e1004383 (2014).
- 672 40. GTEx Consortium. The GTEx Consortium atlas of genetic regulatory effects across human  
673 tissues. *Science* **369**, 1318–1330 (2020).
- 674
